# Supplementary material for: Glycyrrhizic acid restrains airway inflammation and remodeling in asthma via the TGF-β1/Smad signaling pathway
Source: PubMed Central journal article supplement — Exp Ther Med. 2021 Mar 3;21(5):461. doi: 10.3892/etm.2021.9892 (PMC7967847; doi:10.3892/etm.2021.9892), 2021-03-03

Figure S1. Mice with chronic asthma exhibit severe lesions in the airways and more deposited airway collagen fiber. (A) The pathological changes in the airways and alveolar tissues of mice were determined via H&E, Masson and PAS staining (magnification, x200). (B) Inflammation score of the airways and airway side in mice of each group. (C) Inflammation score of the pulmonary alveoli in mice of each group. (D) The levels of Wat/Pbm, Wam/Pbm, Wai/Pbm and Wcol/Pbm were determined via Masson staining. (E) The PAS-positive area per total area was measured. \*\*P<0.01 vs. blank group. H&E, hematoxylin and eosin; PAS, periodic acid-Schiff.

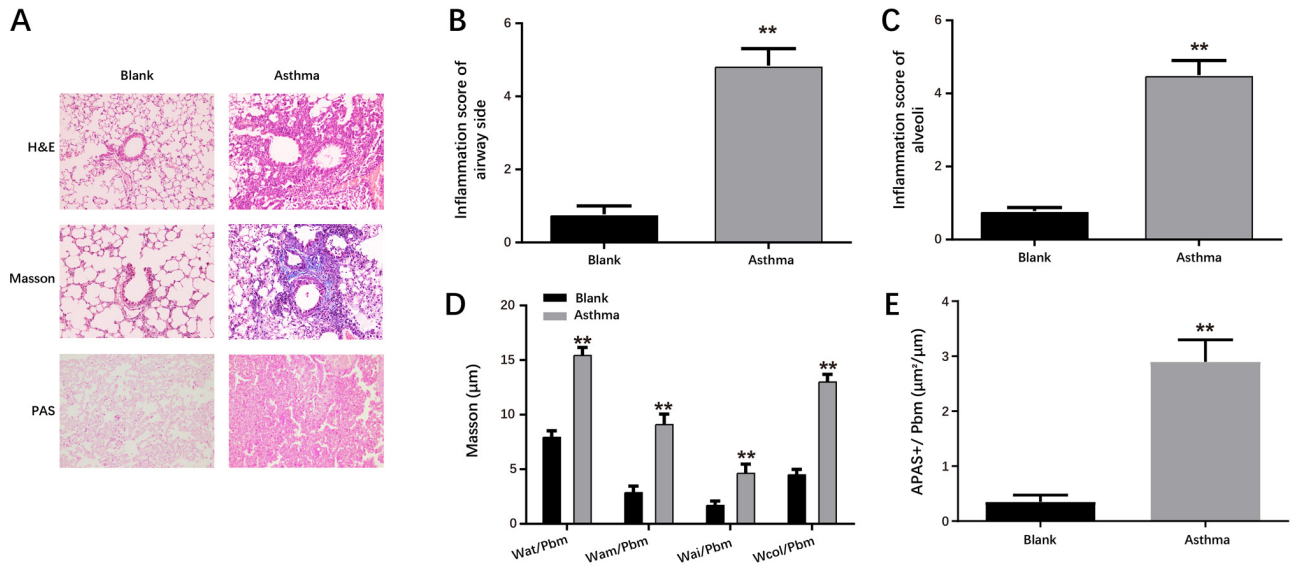

Supplement: Supplementary_Data.pdf [file Supplementary_Data.pdf]
